# Supplementary material for: A microscale anisotropic biaxial cell stretching device for applications in mechanobiology
Source: PubMed Central journal article supplement (PMC3964308; doi:10.1007/s10529-013-1381-5), 2013-10-16
Supplement: 10529_2013_1381_MOESM1_ESM.pdf [file 10529_2013_1381_MOESM1_ESM.pdf]

1 **Electronic Supplementary Material**

2

3 **A microscale anisotropic biaxial cell stretching device for applications in mechanobiology**

4

5 Biotechnology Letters

6

7 Dominique Tremblay<sup>1</sup>, Sophie Chagnon-Lessard<sup>1</sup>, Maryam Mirzaei<sup>1</sup>, Andrew E. Pelling<sup>1,3,4</sup> and Michel

8 Godin<sup>1,2,\*</sup>

9

10 <sup>1</sup>Department of Physics, University of Ottawa, 150 Louis-Pasteur, Ottawa, ON, Canada, K1N 6N5

11 <sup>2</sup>Ottawa-Carleton Institute for Biomedical Engineering, University of Ottawa, 161 Louis Pasteur, Ottawa, ON,  
12 Canada, K1N 6N5

13 <sup>3</sup>Department of Biology, University of Ottawa, 30 Marie Curie, Ottawa, ON, Canada, K1N 6N5

14 <sup>4</sup>Institute for Science, Society and Policy, University of Ottawa, 55 Laurier Ave. East, 10th Floor, Ottawa, ON,  
15 Canada, K1N 6N5

16

17

18 \*Correspondence and request for materials should be addressed to:

19 Michel Godin

20 Department of Physics

21 University of Ottawa

22 150 Louis-Pasteur

23 Ottawa, ON

24 Canada, K1N 6N5

25 Tel.: 1-613-562-5800 x6771

26 Fax: 1-613-562-5190

27 email: michel.godin@uottawa.ca

## 28 **Device fabrication and assembly**

29 To fabricate the 3-layer PDMS device, two master molds were prepared by photolithography on polished  
30 silicon wafers with SU-8 2050 negative photoresist (Microchem, Newton, MA, USA). Masters were further exposed  
31 to Trichloro(1H,1H,2H,2H-perfluorooctyl)silane vapor (Sigma-Aldrich, USA) to ease PDMS removal after curing.  
32 The elastic properties of the PDMS were controlled by varying the ratio of curing agent relative to the base  
33 monomer. The bottom and top sections of the device used a ratio of 1:15 and was cured for 2 h at 80 °C, whereas the  
34 membrane had a ratio of 1:20 to increase the elasticity and was cured for 1 h at 80 °C. Fluorescent beads  
35 (FluoSpheres, 200 nm, Invitrogen, CA, USA) were embedded into the membrane to act as stationary markers in  
36 order to calibrate the membrane deformation during stretching. Initially suspended in an aqueous solution, the  
37 fluorescent beads were resuspended in isopropanol at a ratio of 1:10 to enhance mixing with the PDMS. PDMS  
38 (1:20) with embedded beads was spin-coated on a clean silicon wafer coated with the releasing agent at a speed of  
39 3000 rpm for 5 min. The bottom section and the membrane were air-plasma treated for 30 s at 30 W, bonded  
40 together and further cured for 30 min at 80 °C. The bottom section, which is now bonded to the membrane, was  
41 peeled off from the underlying wafer. The membrane was then punctured manually with a needle in line with the low  
42 pressure and the fluidic channel ends. Holes were punched in the top section using a biopsy punch, in order to  
43 accommodate external tubing. The bottom (with membrane) and top sections were again air-plasma treated. The top  
44 section was carefully aligned with the bottom part using a mask aligner (OAI, CA, USA). The whole assembly was  
45 further cured for 30 min at 80 °C.

46

## 47 **Incubation chamber**

48 Since PDMS is porous to gas, the device is kept at 37 °C in a humid atmosphere of 5% CO<sub>2</sub> and 95% air to  
49 maintain culture medium pH at a physiological value. As depicted in Supplementary Fig. 1 in Online Resource 4, the  
50 device is placed in a petri dish, which is put into a petri dish heater, and kept at a temperature on 37 °C. A lid with  
51 holes allows the insertion of external tubing and gas input of 5% CO<sub>2</sub> and 95% air at a flow rate of 100 ml/min. To  
52 maintain humid conditions, sponges filled with water are placed inside the petri dish. The whole set up is covered  
53 with a plexi-glass heating box to prevent condensation from forming on the lid covering the petri dish heater, and to  
54 keep the lid temperature at 38 °C.
